# Supplementary material for: An ultrathin and compact electron transport layer made from novel water-dispersed Fe3O4 nanoparticles to accomplish UV-stable perovskite solar cells
Source: Royal Society of Chemistry journal article supplement (doi:10.1039/d0ma01027h), 2021-01-01
Supplement: d0ma01027h1.pdf [file d0ma01027h1.pdf]

## ***Supporting Information***

### **Ultrathin and compact electron transport layer made from novel water-dispersed Fe<sub>3</sub>O<sub>4</sub> nanoparticles to accomplish UV-stable perovskite solar cells**

*Song Fang,<sup>a+</sup> Bo Chen,<sup>a+</sup> Bangkai Gu,<sup>a</sup> Linxing Meng,<sup>a</sup> Hao Lu,<sup>a\*</sup> and Chang Ming Li<sup>a,b,c,d\*</sup>*

a: Institute of Materials Science & Devices, School of Materials Science and Engineering, Suzhou University of Science and Technology, Suzhou, 215009, China.

b: Jiangsu Key Laboratory of Micro and Nano Heat Fluid Flow Technology and Energy Application, School of Environmental Science and Engineering, Suzhou University of Science and Technology, Suzhou 215009, China.

c: Institute of Advanced Cross-field Science and College of Life Science, Qingdao University, Qingdao 200671, P.R. China.

d: Institute for Clean Energy & Advanced Materials, Southwest University, Chongqing, 400715 P. R. China.

Email: [luhaoshaobo@163.com](mailto:luhaoshaobo@163.com), [ecmli@swu.edu.cn](mailto:ecmli@swu.edu.cn)

<sup>+</sup> These authors contributed equally to this work

<sup>\*</sup>Corresponding author

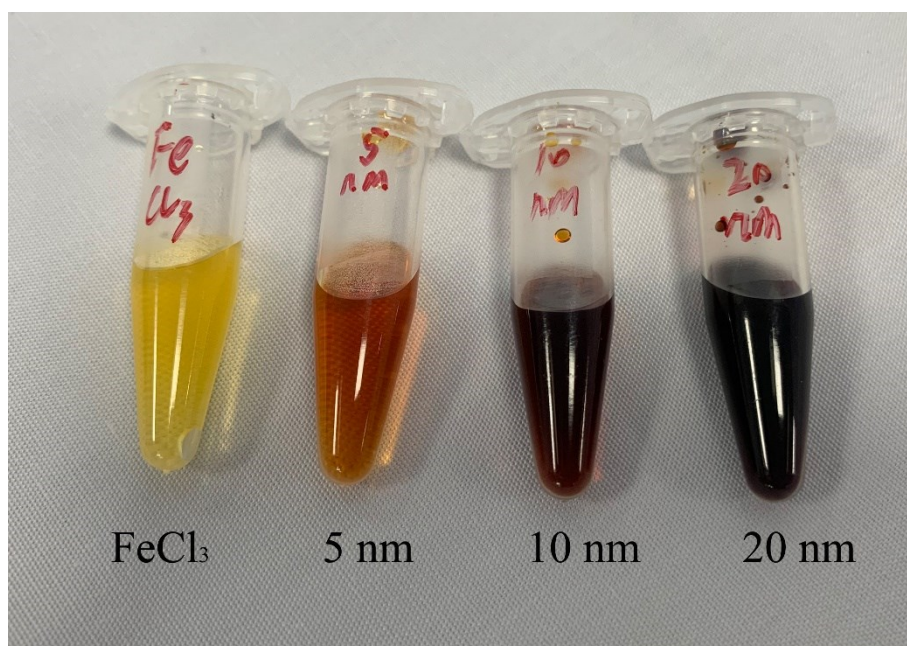

**Figure S1** The photo of different solution (taken in our lab).

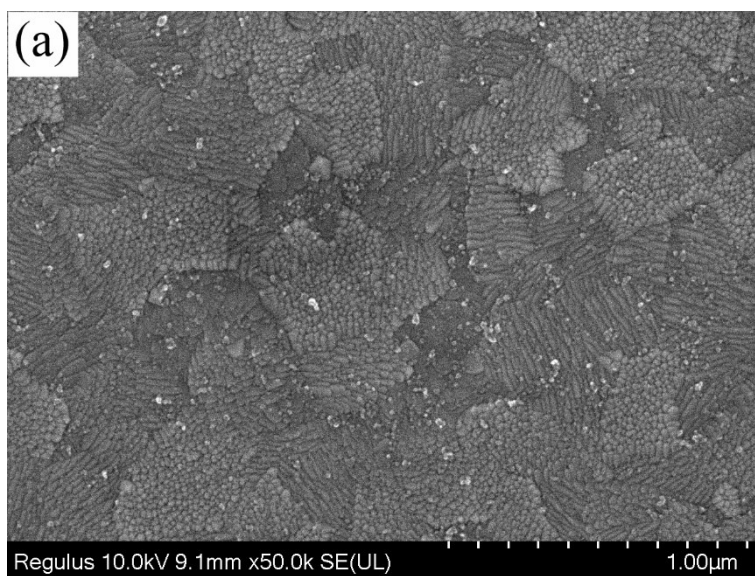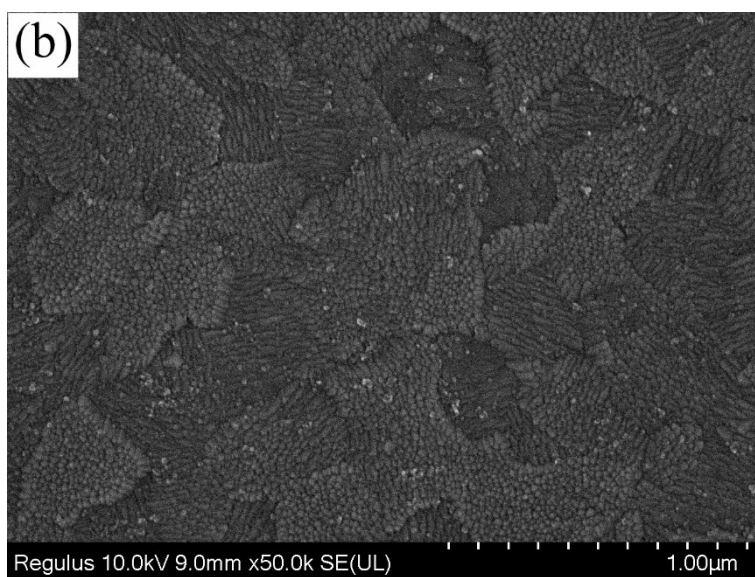

**Figure S2** SEM images of a) 5nm and b) 20 nm samples.

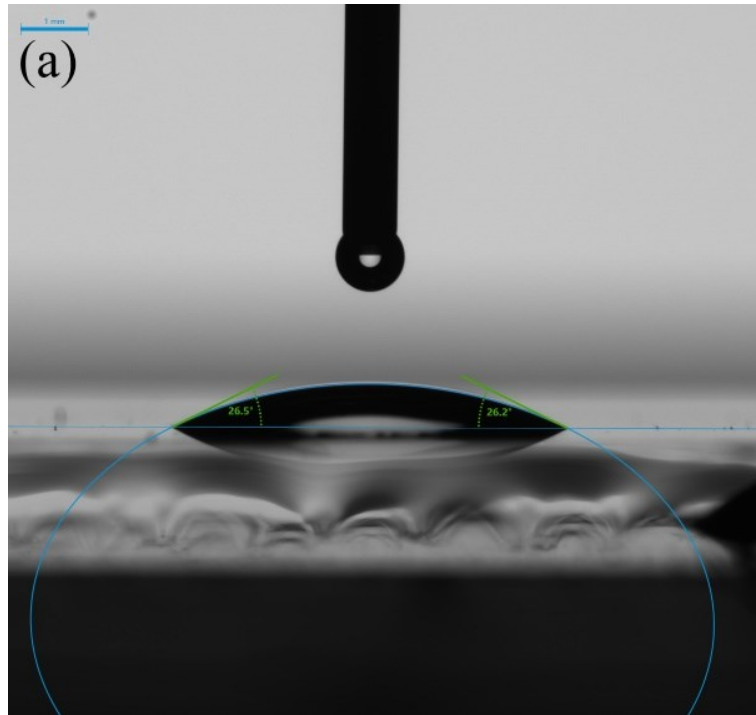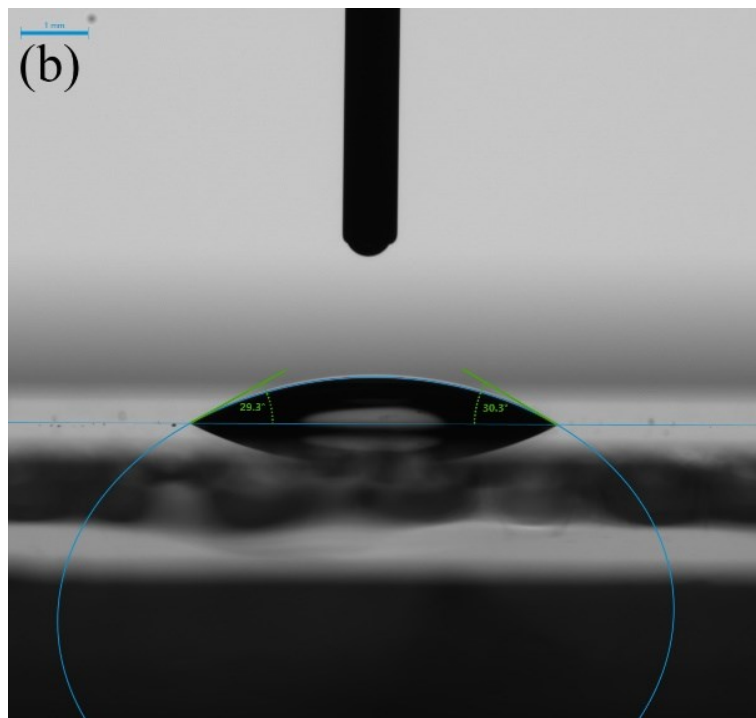

**Figure S3** Contact angle test of a)  $\text{FeCl}_3$  and b)  $\text{Fe}_3\text{O}_4$  prepared  $\text{Fe}_2\text{O}_3$  film.

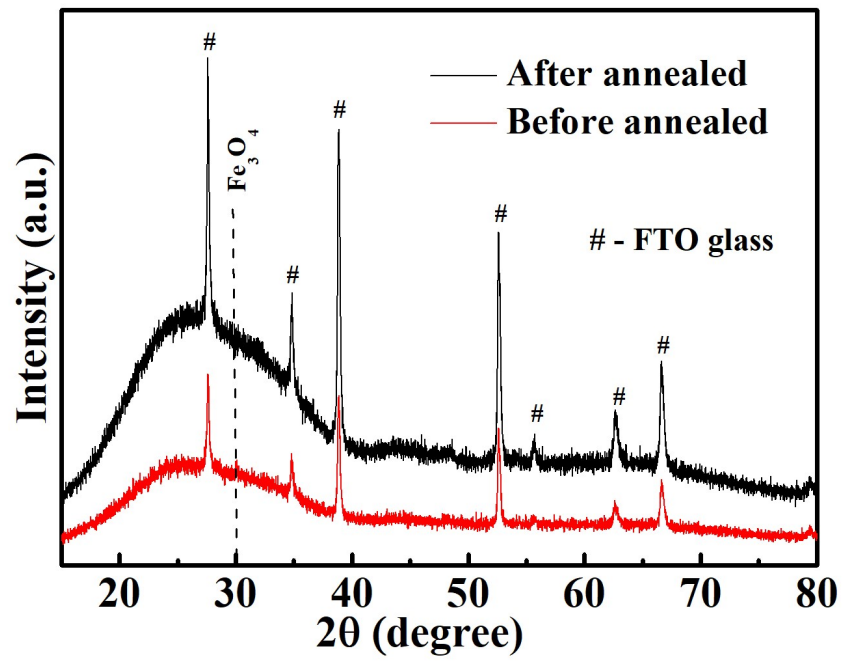

**Figure S4** XRD pattern of Fe<sub>2</sub>O<sub>3</sub> film before and after annealed.

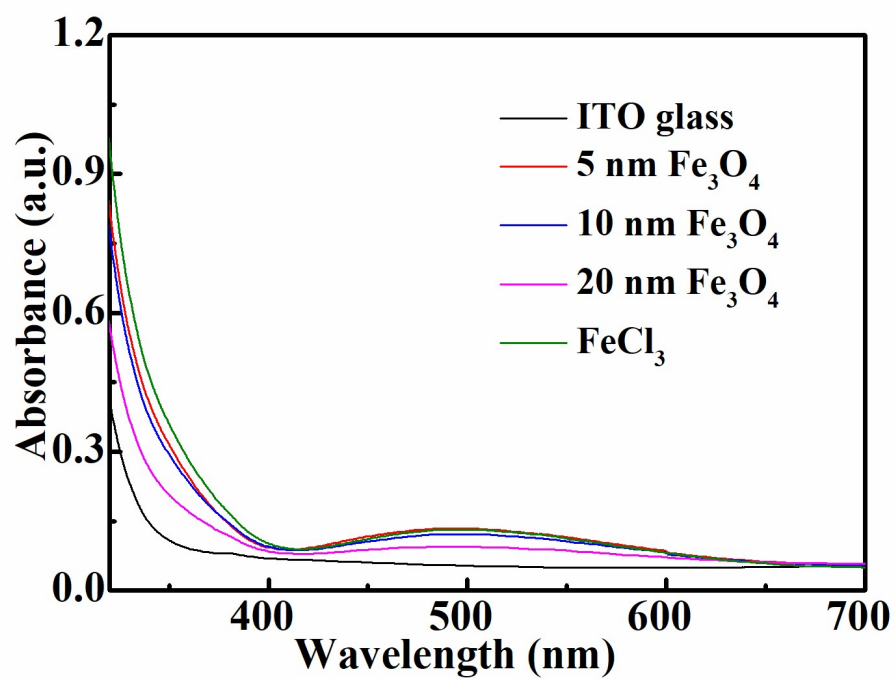

Figure S5 Absorbance measurement of ITO and Fe<sub>2</sub>O<sub>3</sub> film with different method.

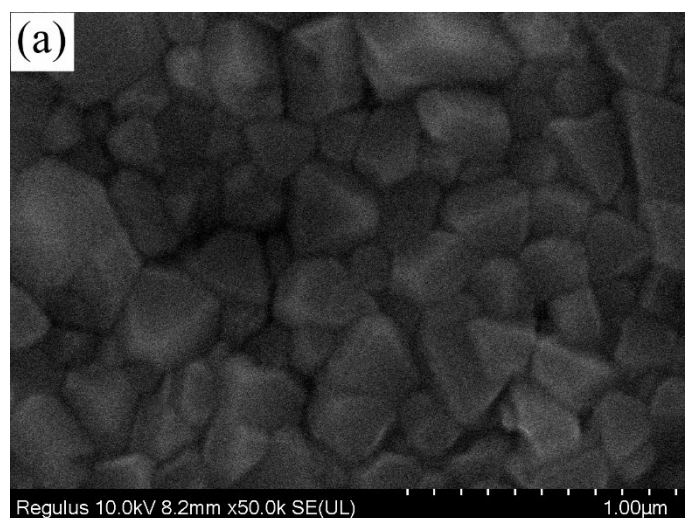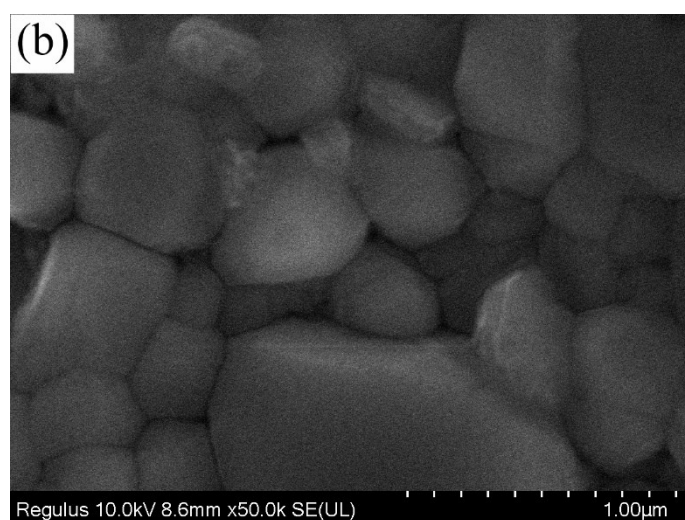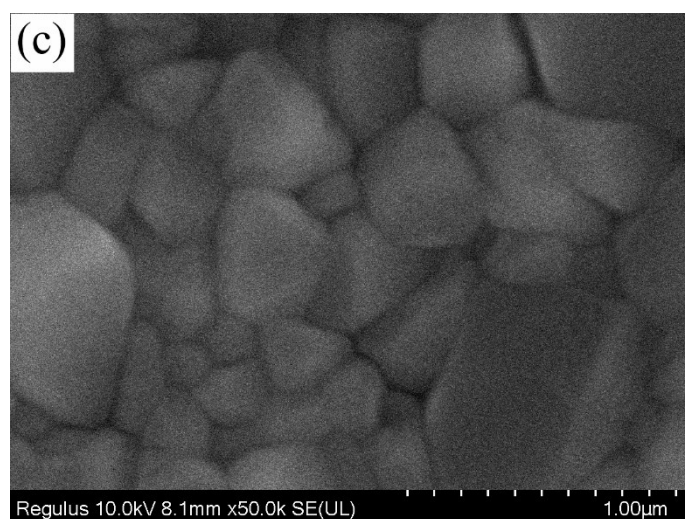

**Figure S6** SEM images of perovskite on a)  $\text{FeCl}_3$ , b) 5 nm and c) 20 nm  $\text{Fe}_2\text{O}_3$  samples

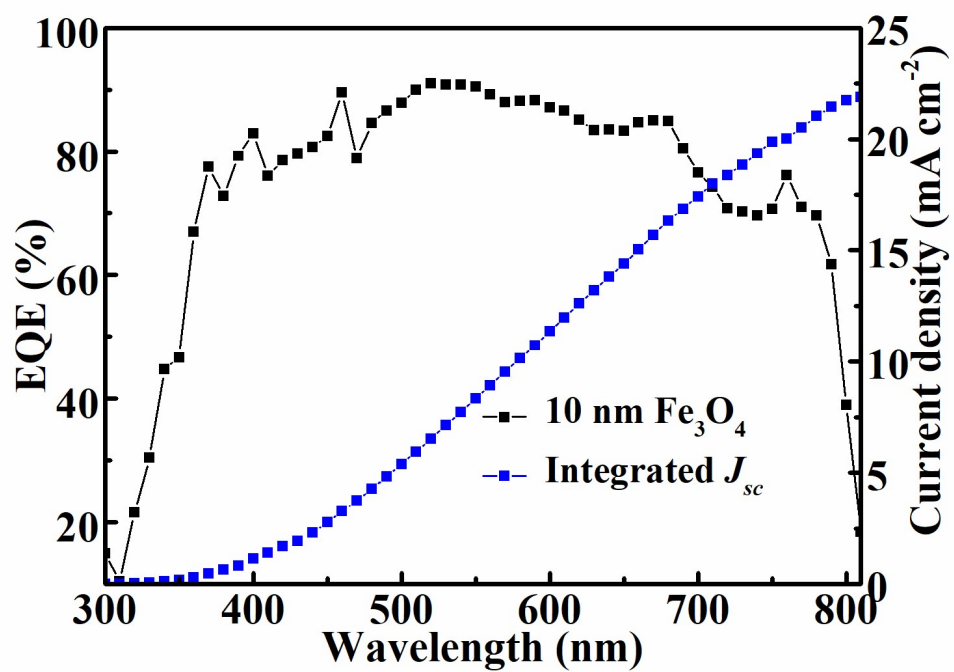

Figure S7 EQE and integrated  $J_{sc}$  of 10 nm  $\text{Fe}_3\text{O}_4$  sample.



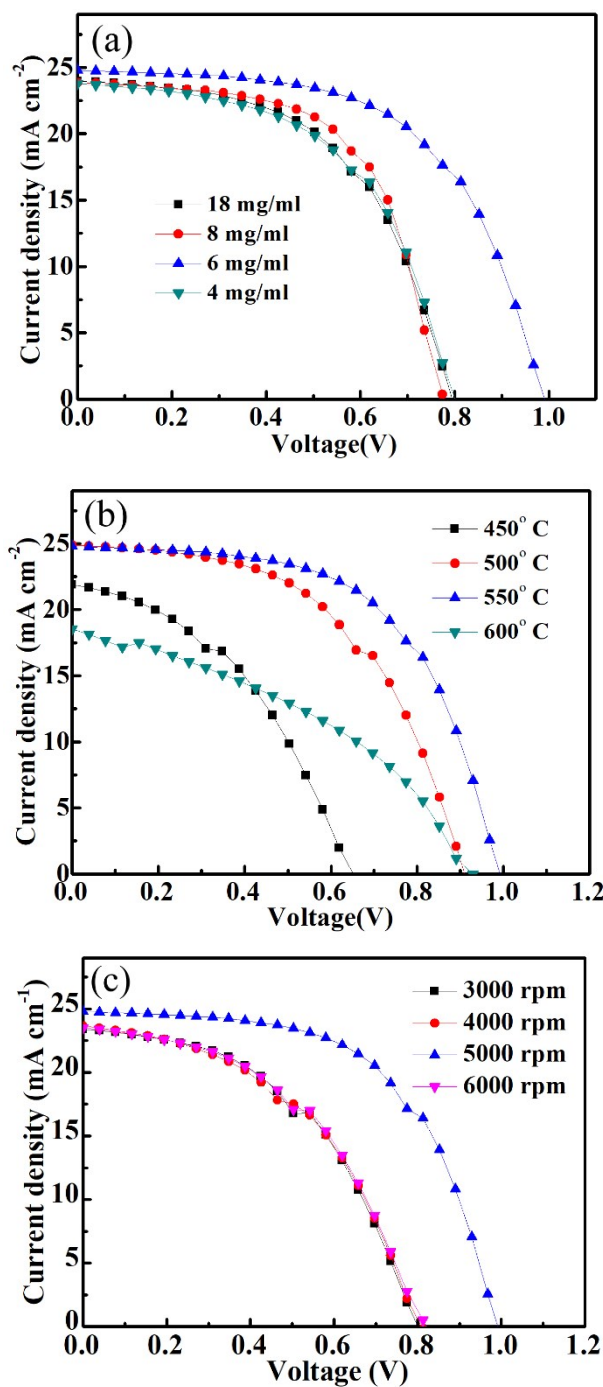

**Figure S8.** J-V curves of a) different concentration, b) temperature and c) spin speed samples.

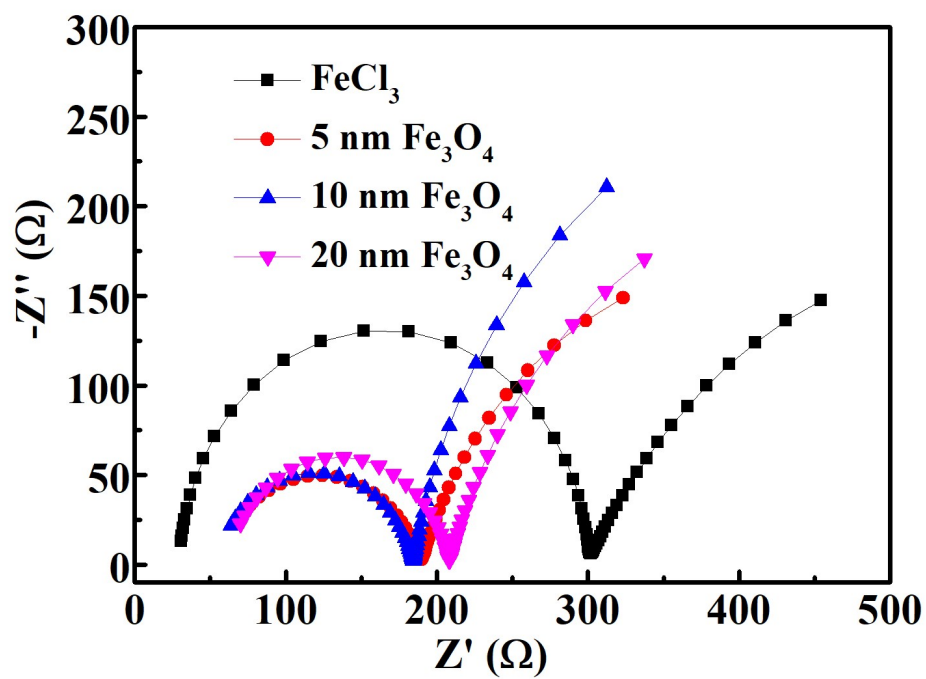

**Figure S9.** Fitted EIS of different  $\text{Fe}_2\text{O}_3$  layer samples.

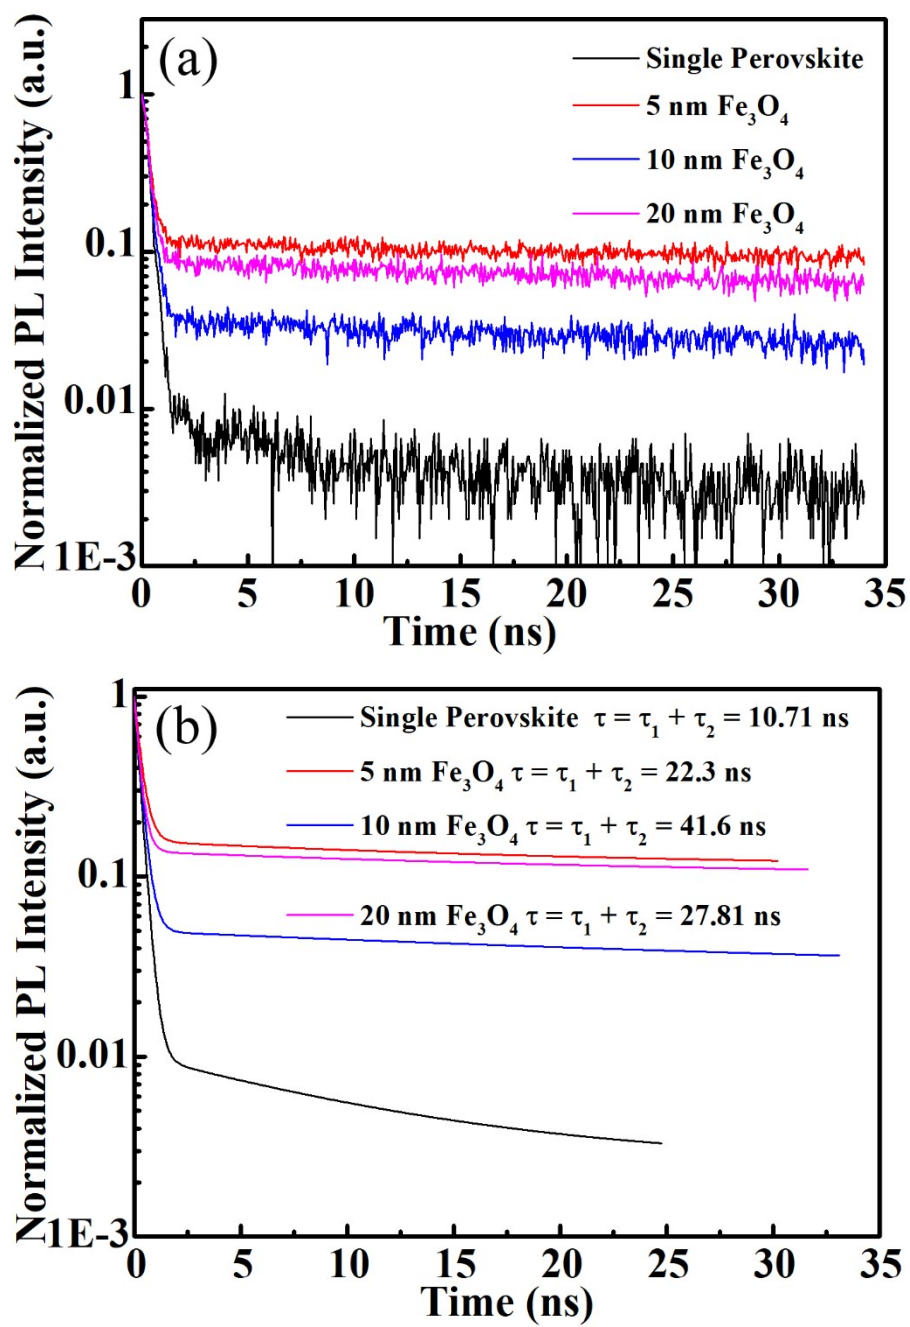

Figure S10 a) TRPL and b) Fitted TRPL curves of different samples

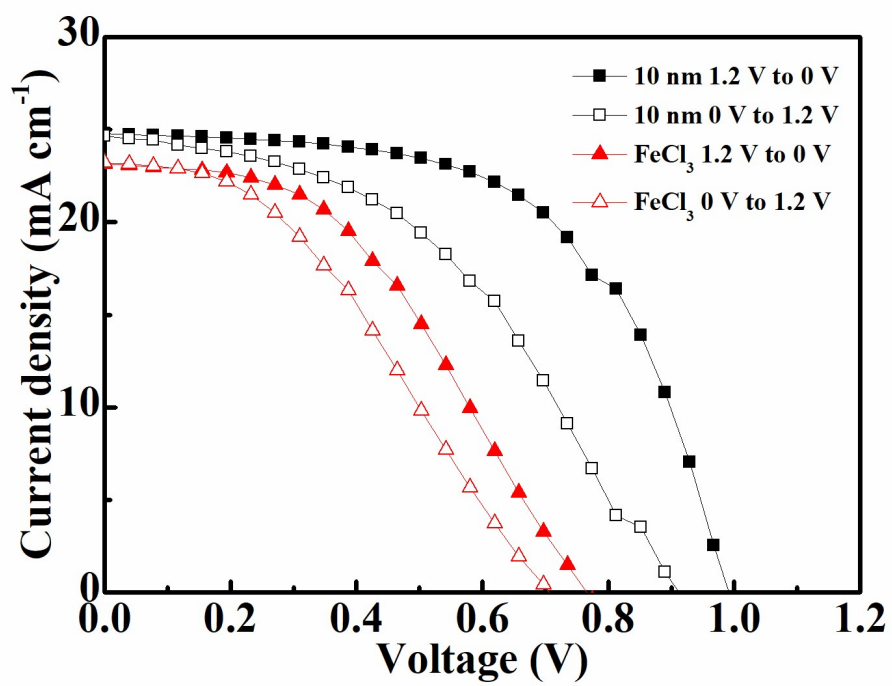

**Figure S11.** Forward and reverse scan of 10 nm and FeCl<sub>3</sub> samples.

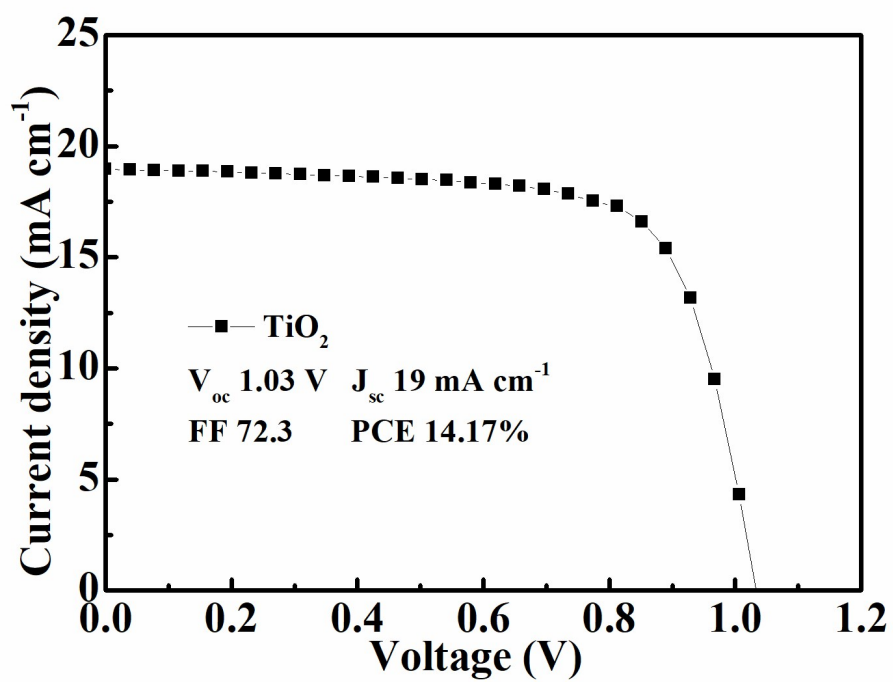

Figure S12. J-V curve of TiO<sub>2</sub> sample.

| Sample            | $V_{oc}$ (V) | $J_{sc}$ (mA cm <sup>-2</sup> ) | Fill Factor (%) | Efficiency (%) |
|-------------------|--------------|---------------------------------|-----------------|----------------|
| FeCl <sub>3</sub> | 0.78 ± 0.06  | 23.14 ± 0.06                    | 43.52 ± 1.39    | 7.58 ± 0.32    |
| 5 nm              | 0.91 ± 0.04  | 24.65 ± 0.16                    | 47.82 ± 4.58    | 10.78 ± 0.90   |
| 10 nm             | 0.97 ± 0.02  | 24.71 ± 0.21                    | 54.60 ± 4.74    | 13.24 ± 1.14   |
| 20 nm             | 0.97 ± 0.02  | 24.93 ± 0.30                    | 49.16 ± 3.84    | 11.96 ± 1.02   |

**Table S1.** Summary of photovoltaic parameters of solar cells with different ETLs

| Sample            | $R(\Omega)$ | $R_{ct} (\Omega)$ | $R_{rec} (\Omega)$ |
|-------------------|-------------|-------------------|--------------------|
| FeCl <sub>3</sub> | 58.2        | 270               | 573                |
| 5 nm              | 54.1        | 136               | 465                |
| 10 nm             | 53.8        | 131               | 676                |
| 20 nm             | 61.3        | 147               | 577                |

**Table S2.** The fitted values of  $R_{ct}$  and  $R_{rec}$  for solar cells.
